# Supplementary material for: Compensation&nbsp;Capacity of The Living-Related Donor’s Remnant Kidney and Recipient’s Transplanted Kidney
Source: Research Square preprint supplement (doi:10.21203/rs.3.rs-132281/v1), 2020-12-28
Supplement: Supplementary file 1 [file d39b3b69f4d22f614699ce99.docx]

**Declaration**

**Ethics approval and consent to participate**

Ethical approval was granted by the Ethics Committee of Ruijin Hospital of Shanghai Jiaotong University School of Medicine, China. Written informed consent for participation was obtained from all participants and/or their legal guardian/s.

This retrospective chart review study involving human participants was in accordance with the ethical standards of the institutional and national research committee and with the 1964 Helsinki Declaration and its later amendments (as revised in 2013) or comparable ethical standards.

**Consent for publication**

Not applicable.

**Availability of data and materials**

The datasets used and analyzed during the current study are available from

the corresponding author on reasonable request.

**Competing interests**

The authors declare no conflict of interests. The results presented in this

paper have not been published previously in whole or part.

**Funding**

None.

**Authors’ contributions**

All authors listed above have contributed sufficiently to be included as authors. All of the authors had full access to the data for this study and take full responsibility for the integrity of the data and the accuracy of the data analysis. Juping Zhao, Danfeng Xu and Peijun Zhou conceived and designed the study. Xin Huang, Binbin Ma, Kun Shao and Huimin An performed the surgeries. Binbin Ma, Wenhao Lin and Jun Dai analyzed the data and drafted the manuscript. All of the authors revised the article critically, gave final approval of submission and agreed to be accountable for all aspects of the work.

**Acknowledgements**

We would like to thank all patients and their families for participating in this

Study. We are very grateful to professor Peijun Zhou, Xianghui Wang and Da Xu from Ruijin Hospital of Shanghai Jiaotong University School of Medicine in China for their valuable kidney transplantation and total devotion to their job.

**Authors’ information**

Xin Huang1┼, Binbin Ma2┼, Wenhao Lin1, Kun Shao1, Huimin An1, Jun Dai1, Danfeng Xu1, Peijun Zhou1*, Juping Zhao1*

1Department of Urology, Ruijin Hospital of Shanghai Jiaotong University School of Medicine, Shanghai 200025, China.

2Department of Urology, Ruijin Hospital Luwan Branch of Shanghai Jiaotong University School of Medicine, Shanghai 200020, China.

┼These authors contributed fully and equally to this work.

* co-corresponding author
